# Supplementary material for: Understanding the impact of the molecular crowding environment on the glyoxal-mediated glycation of hemoglobin
Source: Royal Society of Chemistry journal article supplement (doi:10.1039/d5cp00633c), 2025-01-01
Supplement: d5cp00633c1.pdf [file d5cp00633c1.pdf]

## Understanding of the Impact of the Molecular Crowding Environment on the Glyoxal Mediated Glycation of Hemoglobin

Mangal Deep Burman<sup>a</sup>, Sagar Bag<sup>a</sup>, Souvik Ghosal<sup>b</sup>, and Sudipta Bhowmik<sup>a,b,\*</sup>

<sup>a</sup>Department of Biophysics, Molecular Biology and Bioinformatics, University of Calcutta, Kolkata-700009, India.

<sup>b</sup>Mahatma Gandhi Medical Advanced Research Institute (MGMRI), Sri Balaji Vidyapeeth (Deemed to be University), Pondy–Cuddalore Main Road, Pillaiyarkuppam, Pondicherry – 607402, India.

\*Corresponding author: Sudipta Bhowmik ([su\\_sudipta@yahoo.co.in](mailto:su_sudipta@yahoo.co.in), [sbbmbg@caluniv.ac.in](mailto:sbbmbg@caluniv.ac.in)).

## Contents

|                                                                                                                                                                                                            |   |
|------------------------------------------------------------------------------------------------------------------------------------------------------------------------------------------------------------|---|
| <b>Fig. S1</b> UV-Vis absorption spectra of Hb incubated with different percentages of PEG 200.....                                                                                                        | 2 |
| <b>Fig. S2</b> CD spectra of Hb incubated with different percentages of PEG 200.....                                                                                                                       | 3 |
| <b>Table. S1</b> Table of percentages of $\alpha$ -helix of different Hb samples.....                                                                                                                      | 3 |
| Dynamic Light Scattering.....                                                                                                                                                                              | 4 |
| Assessment of reduction of radius of glycated Hb in the crowded environment .....                                                                                                                          | 4 |
| <b>Fig. S3</b> Dynamic light scattering results of different Hb samples. (a) Control Hb, (b) Glycated Hb, (c) Glycated Hb + 10% PEG 200, (d) Glycated Hb + 20% PEG 200, (e) Glycated Hb + 40% PEG 200..... | 5 |
| <b>Table S2.</b> DLS analysis results of different Hb samples. ....                                                                                                                                        | 5 |
| Reference .....                                                                                                                                                                                            | 5 |

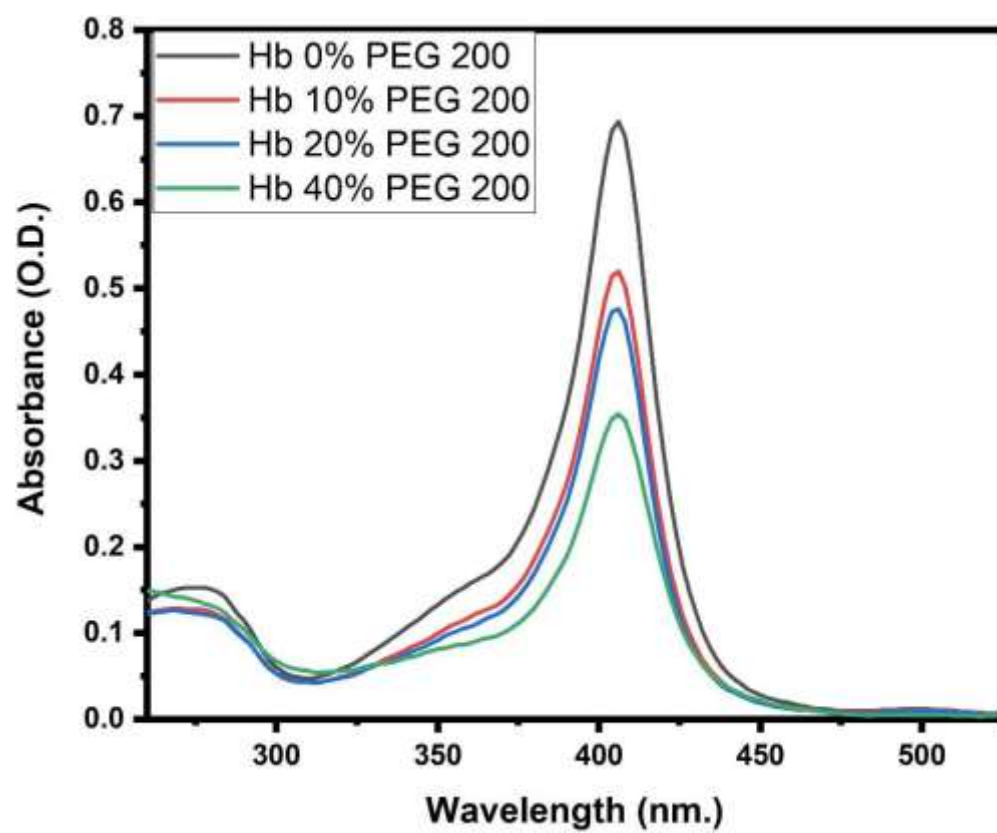

**Fig. S1** UV-Vis absorption spectra of Hb incubated with different percentages of PEG 200.

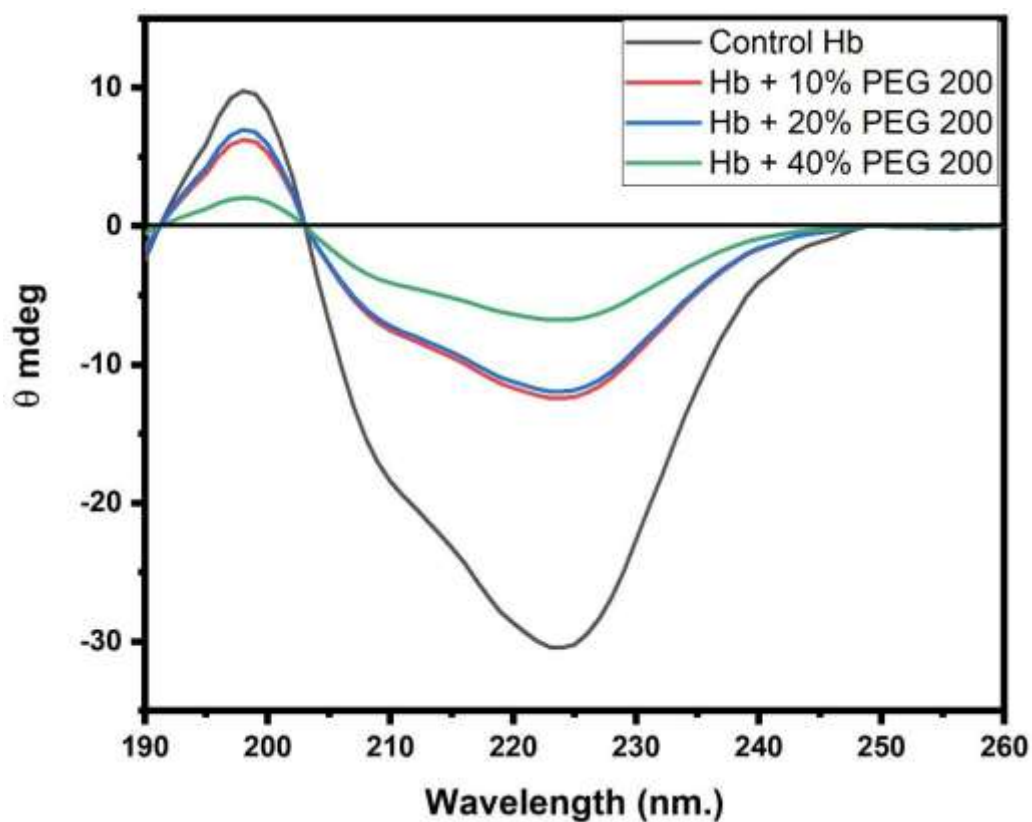

**Fig. S2** CD spectra of Hb incubated with different percentages of PEG 200.

**Table. S1** Table of percentages of  $\alpha$ -helix of different Hb samples.

| Samples          | Helix (%) |
|------------------|-----------|
| Control Hb       | 49.77     |
| Hb + 10% PEG 200 | 15.7      |
| Hb + 20% PEG 200 | 14.79     |
| Hb + 40% PEG 200 | 5.04      |

## Dynamic Light Scattering-

Dynamic light scattering experiment was performed using Nano-ZS (Malvern) instrument. Before the experiment, all samples were filtered using 0.2  $\mu\text{m}$  filter. The 10  $\mu\text{M}$  samples were used for the experiment using a cuvette of 1.5 ml with the path length 1 cm. The operating method was the DTS software that came with the instrument to record each run average for 10 seconds. In each case, a specific Stokes radius ( $R_h$ ) was calculated, and the results were represented as a size distribution based on  $R_h$  numbers.<sup>1</sup>

### Assessment of reduction of radius of glycated Hb in the crowded environment

The change in the molecular radius of different Hb samples were investigated using dynamic light scattering (DLS) method to quantify size of the protein. The molecular radius of the native Hb was 3.739 nm. The increase in the radius of glycated Hb indicated the structural alteration (aggregation) of Hb after glycation.<sup>1</sup> The radius of glycated Hb in the presence of different percentages of PEG 200 was getting decreased with increase in the percentages of PEG 200. These results indicated that as the crowding in the media was increased the free volume in the media was decreased. Hence, the Hb in the presence of PEG200 attained more compact structure.

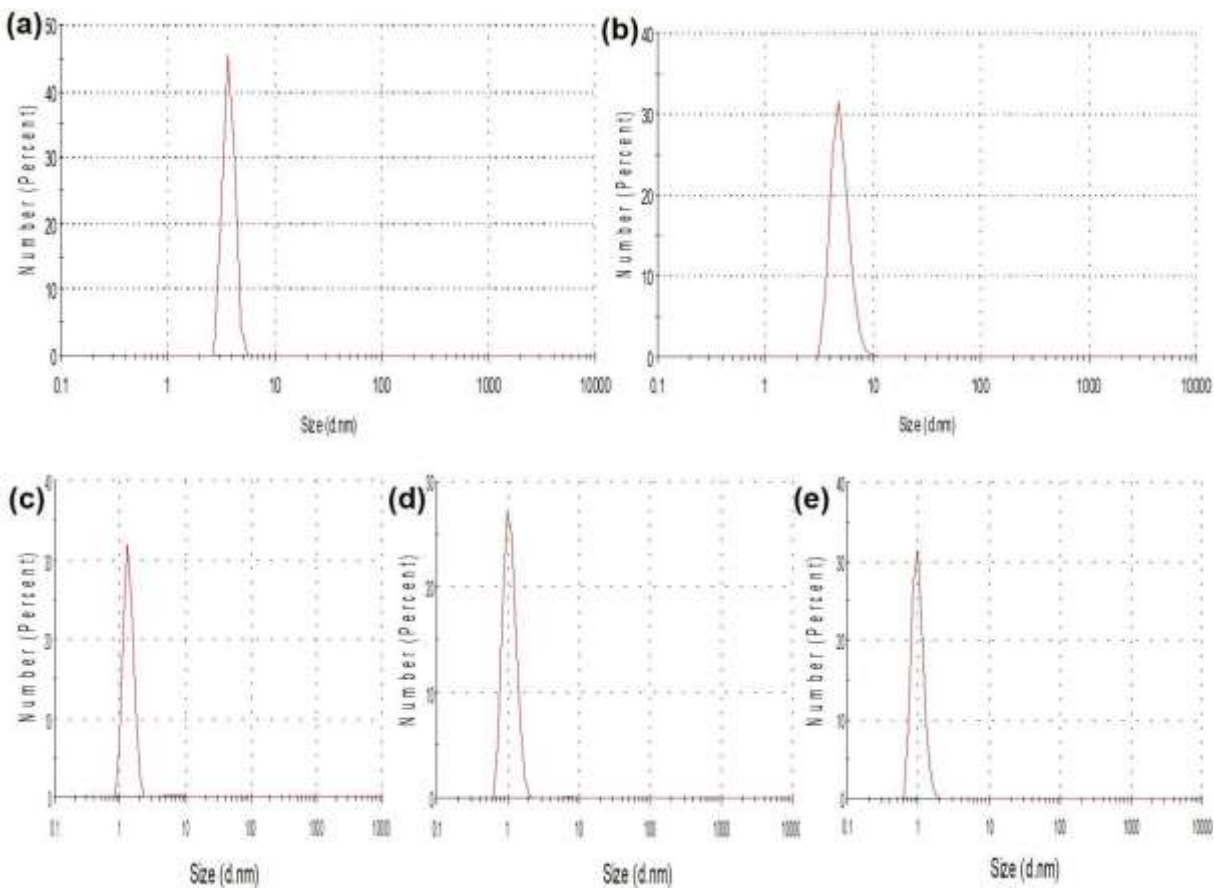

**Fig. S3** Dynamic light scattering results of different Hb samples. (a) Control Hb, (b) Glycated Hb, (c) Glycated Hb + 10% PEG 200, (d) Glycated Hb + 20% PEG 200, (e) Glycated Hb + 40% PEG 200.

**Table S2.** DLS analysis results of different Hb samples.

| Samples                   | Rh (nm) |
|---------------------------|---------|
| Control Hb                | 3.739   |
| Glycated Hb               | 5.115   |
| Glycated Hb + 10% PEG 200 | 1.392   |
| Glycated Hb + 20% PEG 200 | 1.052   |
| Glycated Hb + 40% PEG 200 | 0.979   |

#### Reference

- 1 A. Ghosh, S. Banerjee, A. Mitra, M. Muralidharan, B. Roy, R. Banerjee, A. K. Mandal and I. B. Chatterjee, Interaction of p-benzoquinone with hemoglobin in smoker's blood causes alteration of structure and loss of oxygen binding capacity, *Toxicol. Reports*, 2016, **3**, 295–305.
